# Supplementary material for: The Analysis of Inflammation-Related Proteins in a Cargo of Exosomes Derived from the Serum of Uveal Melanoma Patients Reveals Potential Biomarkers of Disease Progression
Source: MDPI journal article supplement (doi:10.3390/cancers13133334), 2021-07-02
Supplement: s1 [file s1]

# Supplementary Materials: The Analysis of Inflammation-Related Proteins in a Cargo of Exosomes Derived from the Serum of Uveal Melanoma Patients Reveals Potential Biomarkers of Disease Progression

Joanna Patrycja Wróblewska, Michał Stefan Lach, Katarzyna Kulcenty, Łukasz Galus, Wiktoria Maria Suchorska, Daniel Rösel, Jan Brábek and Andrzej Marszałek

LAMP-120 kDa

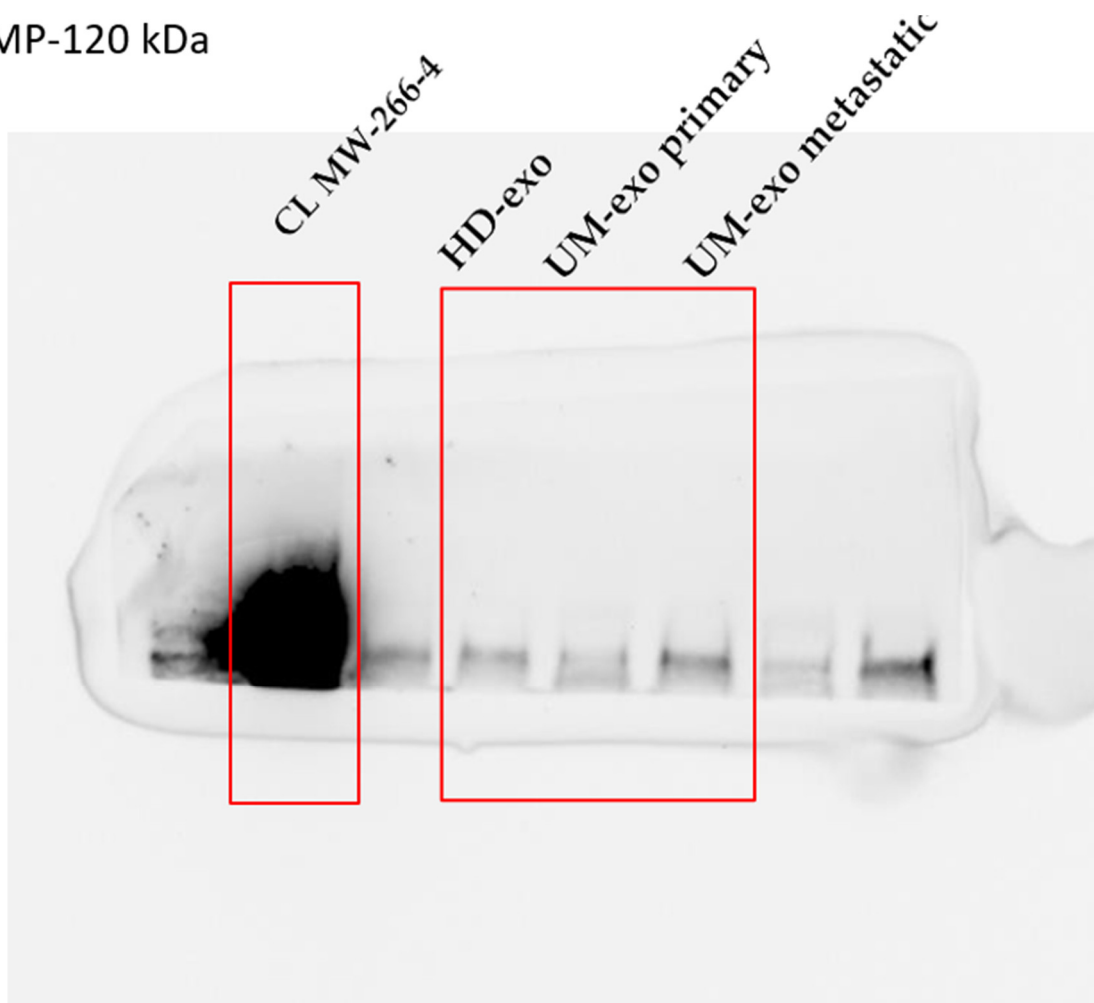

Alix – 96 kDa

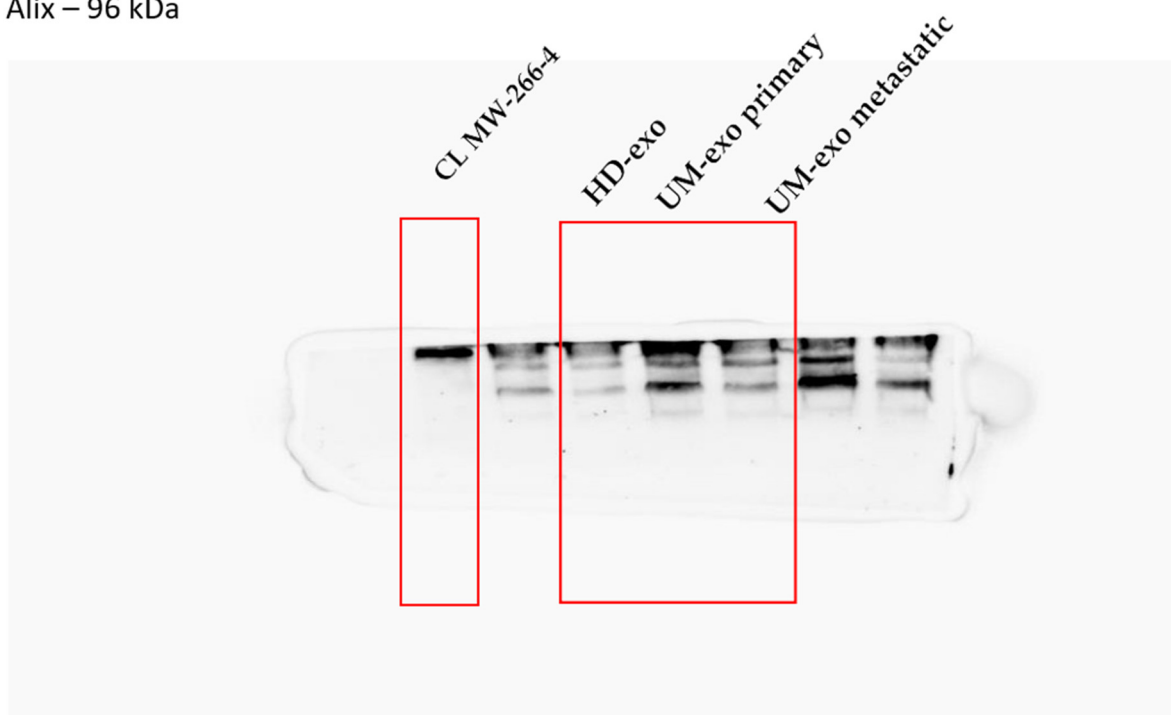

CD63- 26 kDa

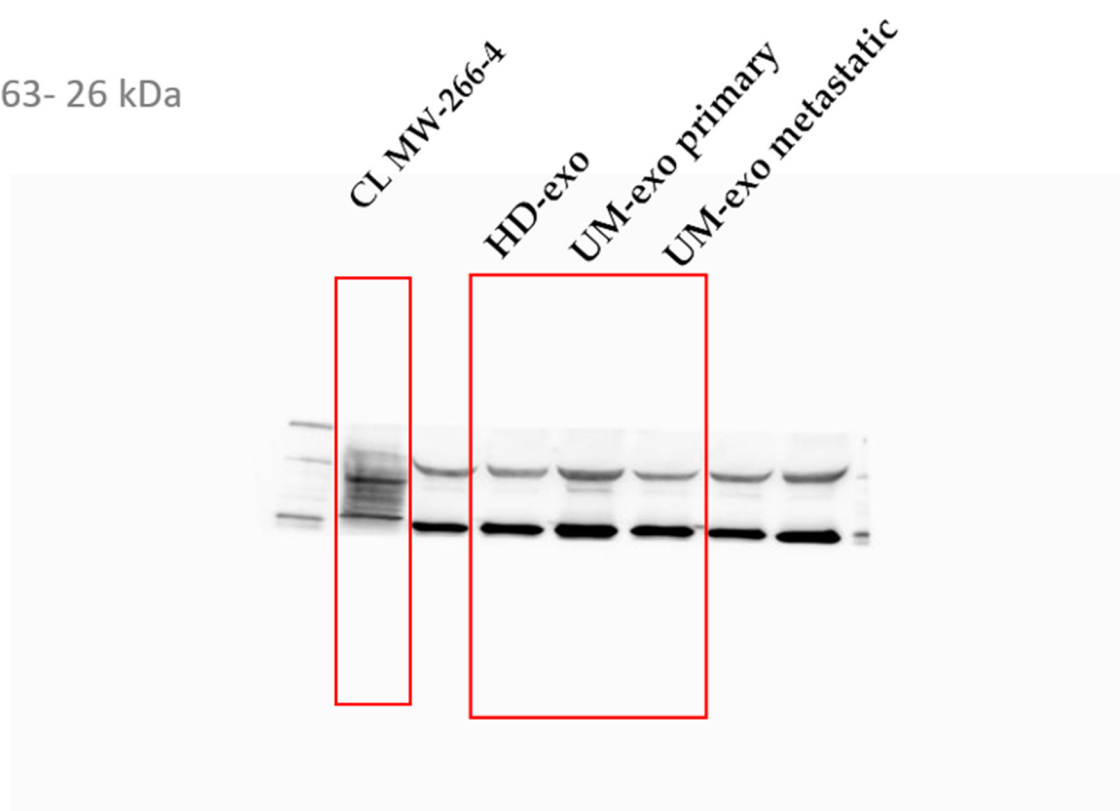

MLANA – 25 kDa

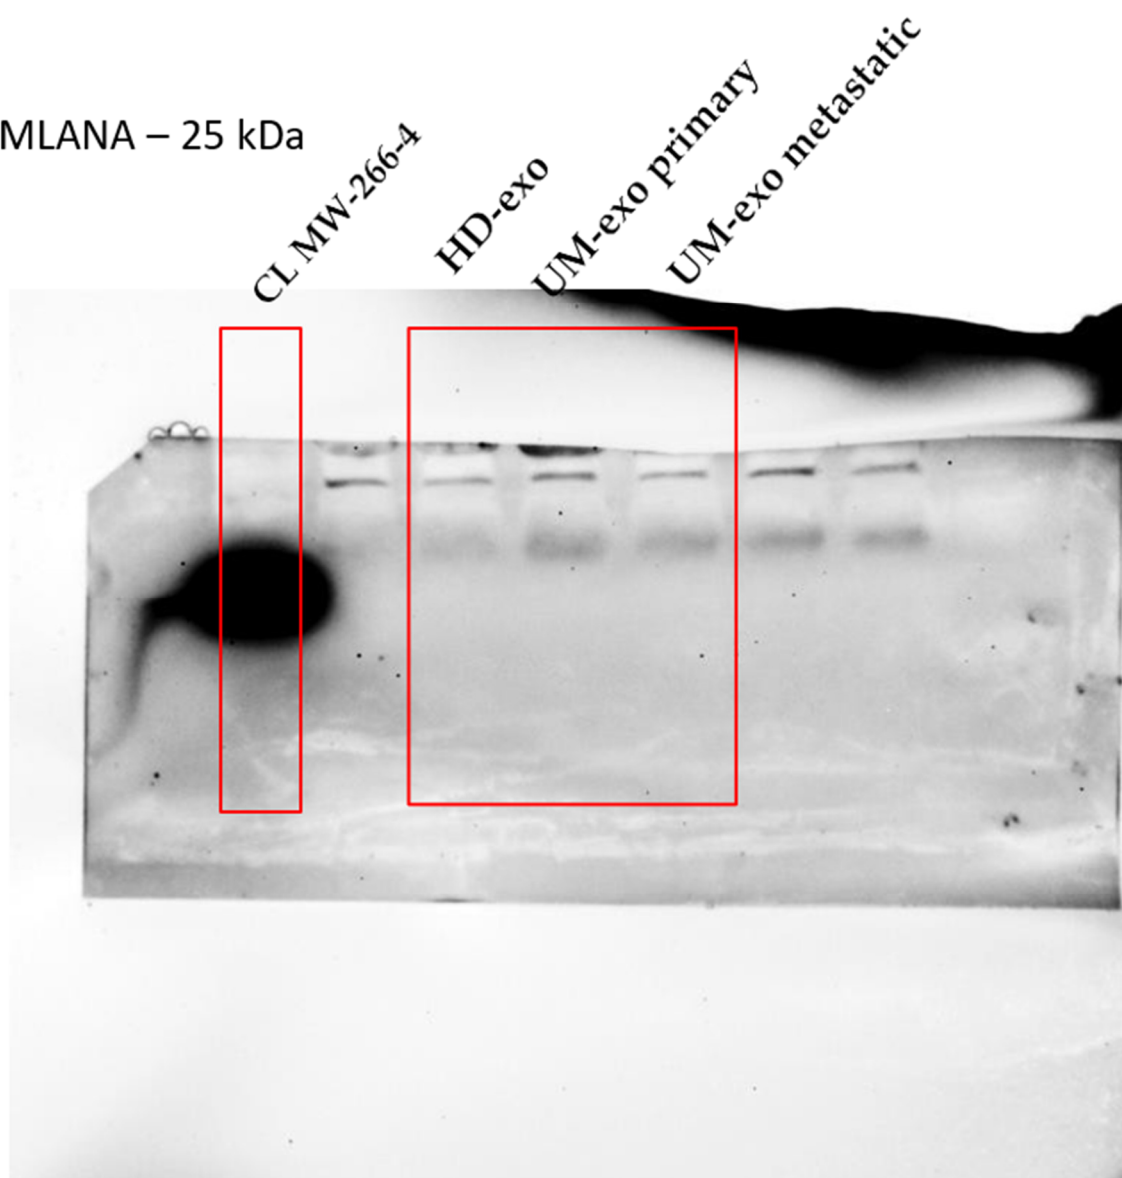

TGFβ1 – 45 kDa

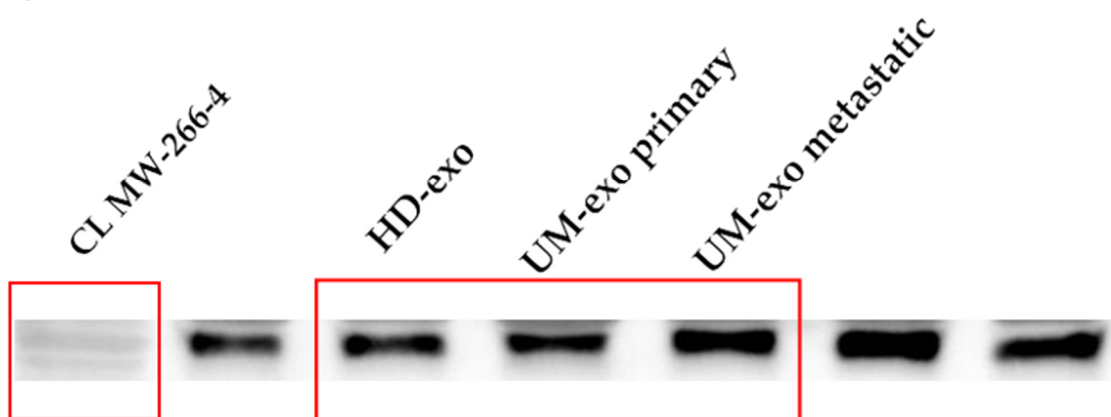

Calnexin – 90 kDa

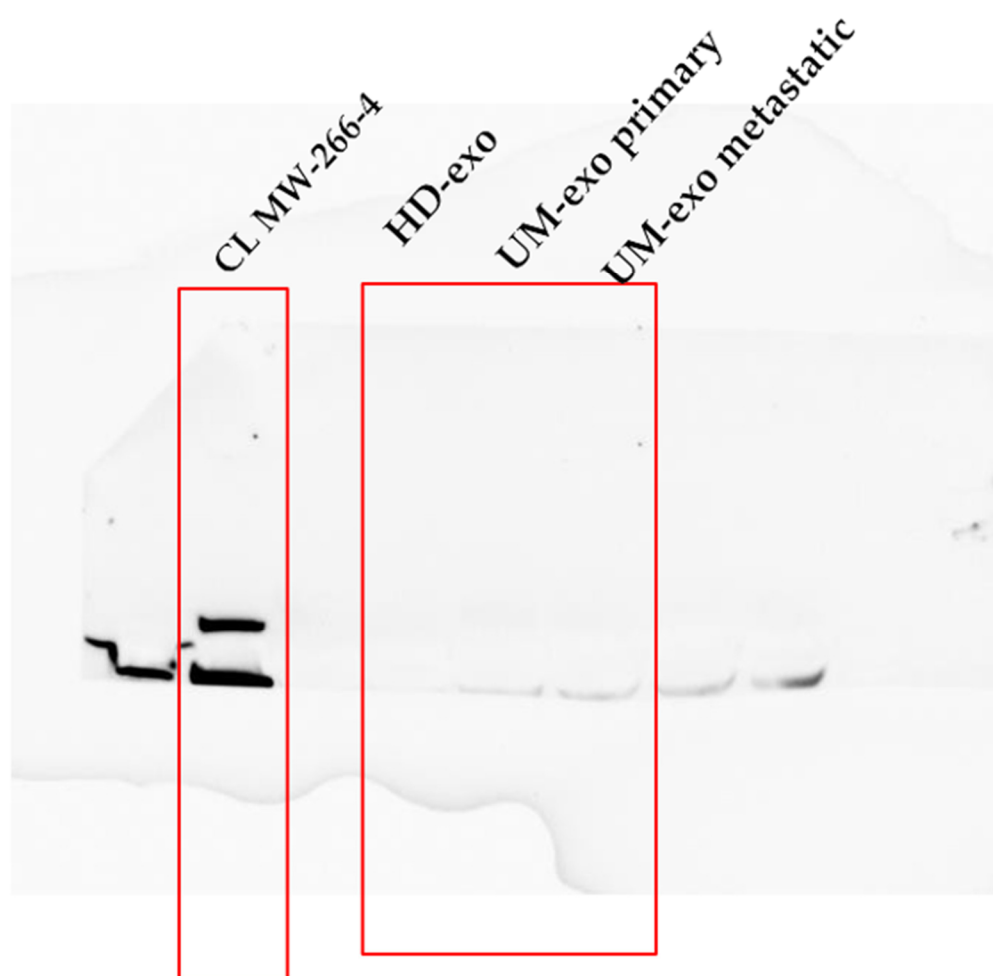

**Figure S1.** Uncropped Western Blot images.
